# Supplementary material
Source: publisher figshare collection journal article supplement (https://tandf.figshare.com/ndownloader/files/21758997)
Supplement: Supplementary file 1 [file 21758997]

Supplementary Material

Released

Before release


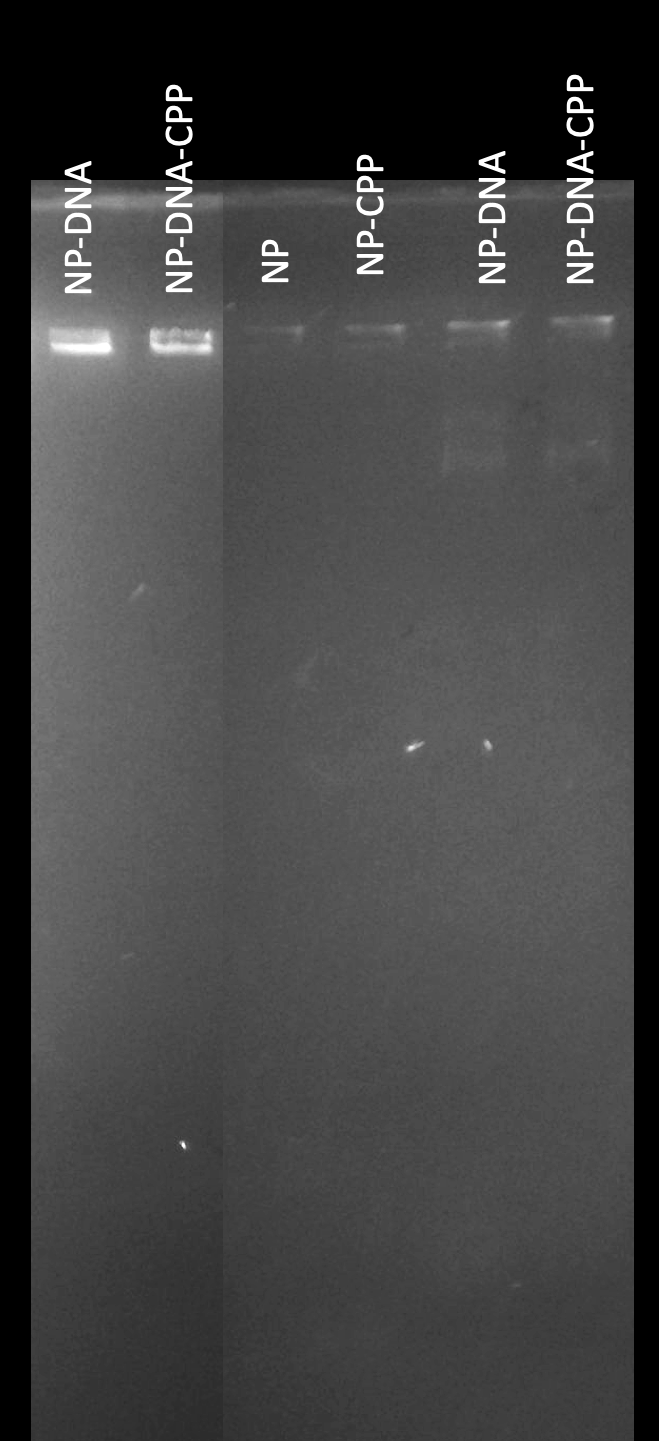


Figure S1: Agarose gel of pDNA released from NP. From left to right the two first bands show NP-DNA and NP-DNA-CPP before the release, followed by the supernatant of placebo particles NP and NP-CPP, and NP-DNA and NP-DNA-CPP.


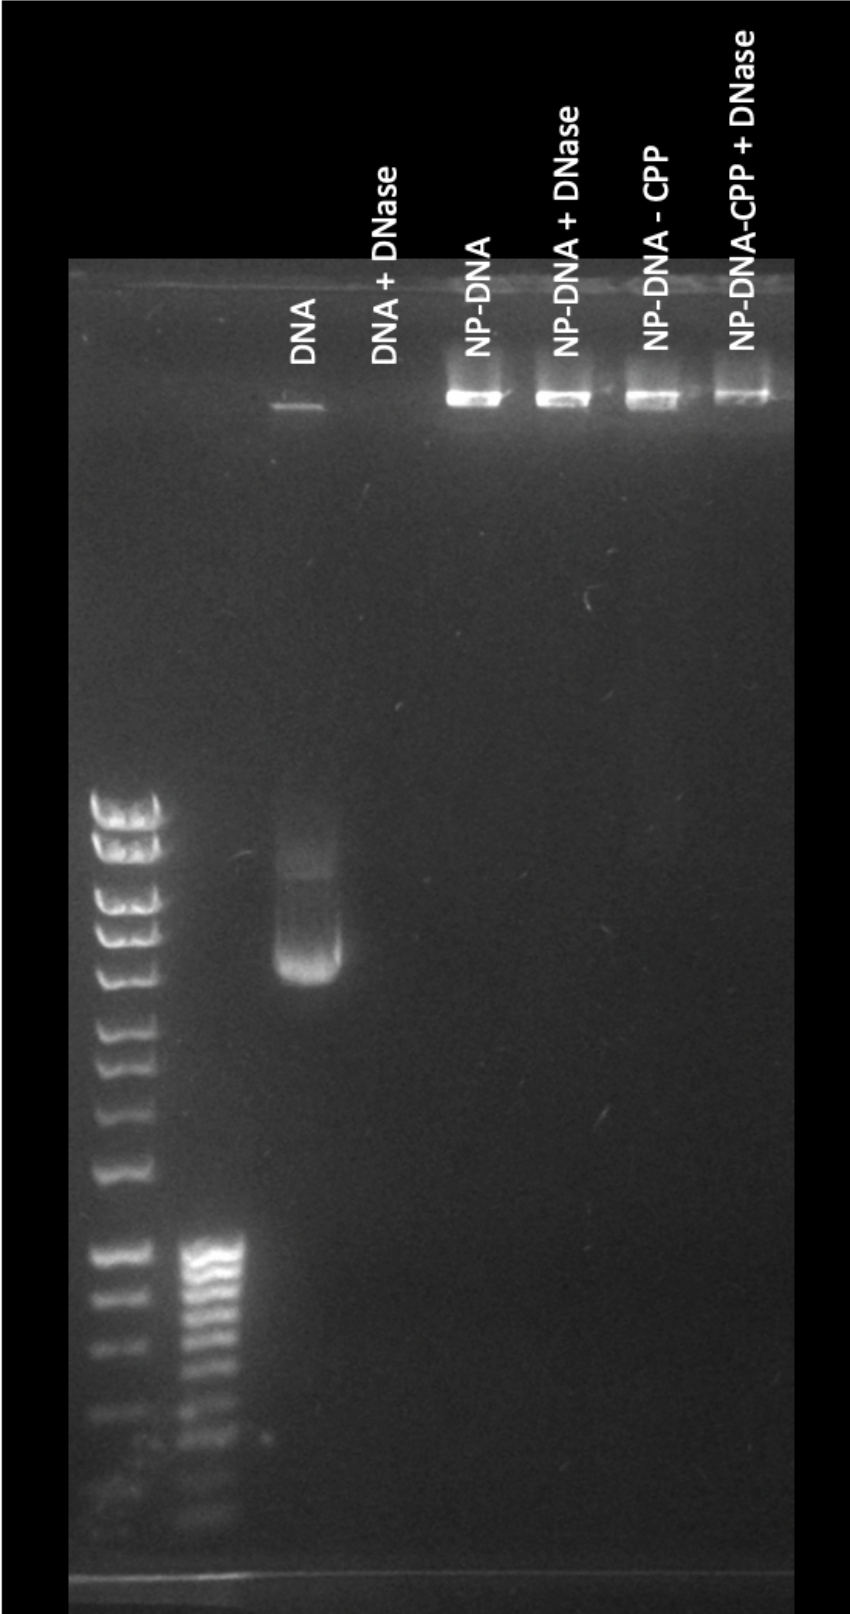


Figure S2: Agarose gel of pDNA, NP-DNA and NP-DNA-CPP before and after incubation with DNase, as indicated in the figure.
